# Supplementary material
Source: Springer Nature journal article supplement (https://www.springermedizin.de/resource/supplementary/12881_2009_629_MOESM2_ESM.pdf/9451096)

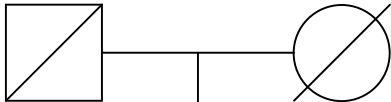

Hans Beuttschi

Margaret Zum Bach

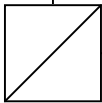

Peter Beuttschi

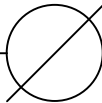

Margarete Oswald

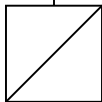

Peter Beuttschi

Supplement: MOESM2 [file 9451096]
